# Supplementary material for: The high-affinity transporter BnPHT1;4 is involved in phosphorus acquisition and mobilization for facilitating seed germination and early seedling growth of Brassica napus
Source: PubMed Central journal article supplement (PMC6482582; doi:10.1186/s12870-019-1765-3), 2019-04-25
Supplement: 12870_2019_1765_MOESM1_ESM.pdf [file 12870_2019_1765_MOESM1_ESM.pdf]

## Additional File 1

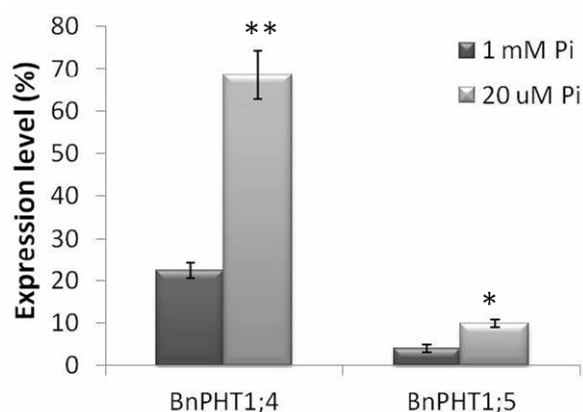

**Figure S1. Expression profiling of *BnPHT1;4* and *BnPHT1;5* in 24-hours-imbibed seeds of *Brassica napus* under Pi starvation.** Total RNA was isolated from 24-hours-imbibed seeds on 1/2 MS medium with 1 mM or 20 μM Pi for quantitative RT-PCR analysis, using *BnACT2* gene as standard control. The error bars indicate the standard errors. Significance of difference was analyzed by Duncan's test ( $P < 0.05$ ,  $n = 3$ ).

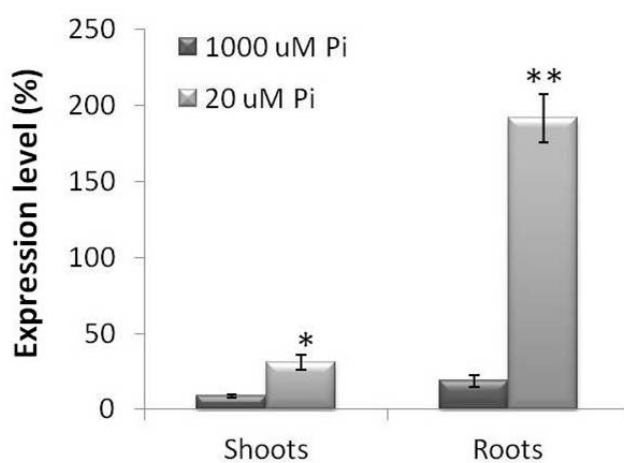

**Figure S2. Expression profiling of *BnPHT1;4* in shoots and roots of *Brassica napus* under Pi starvation.** The 21 DAG seedlings were transferred to 20 or 1000 μM Pi for 3 days, and then total RNA was isolated from shoots and roots for quantitative RT-PCR analysis, using *BnACT2* gene as standard control. The error bars indicate the standard errors. Significance of difference was analyzed by Duncan's test ( $P < 0.05$ ,  $n = 3$ ).

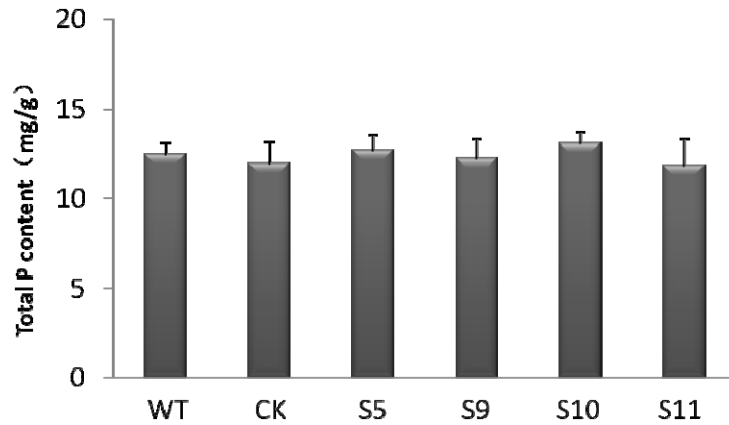

**Figure S3.** Assay of total phosphorus content in seeds of the *BnPHT1;4* overexpression transgenic *Brassica napus*. The error bars indicate the standard errors. Significance of difference was analyzed by Duncan's test (n=3). WT, wild type; CK, transgenic null line; S5, S9, S10 and S11, independent *BnPHT1;4* overexpression transgenic lines.

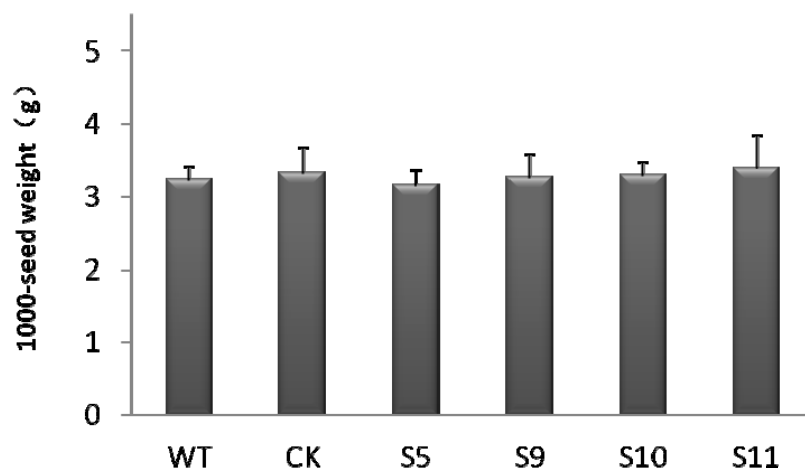

**Figure S4.** Assay of thousand-grain weight of dry seeds of the *BnPHT1;4* overexpression transgenic *Brassica napus*. The error bars indicate the standard errors. Significance of difference was analyzed by Duncan's test (n = 3). WT, wild type; CK, transgenic null line; S5, S9, S10 and S11, independent *BnPHT1;4* overexpression transgenic lines.

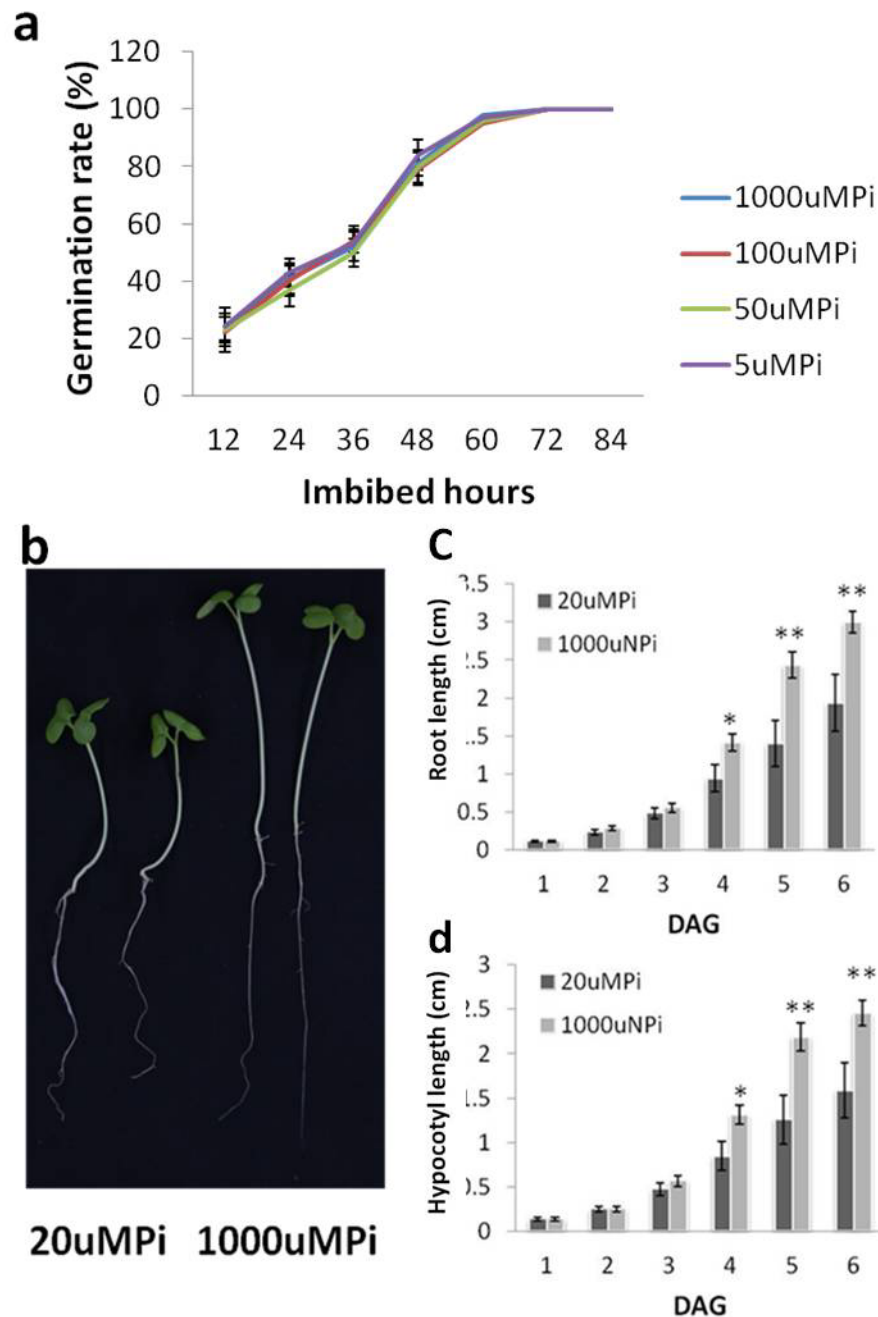

**Figure S5. The effect of exogenous phosphate (Pi) on seed germination and early seedling growth of *Brassica napus*.** (a) Germination of wild type seeds on 1/2 MS medium with different Pi concentrations. Exogenous phosphate content don't affect seed germination. The data are presented as means  $\pm$  SD (n = 5). (b) Phenotype of the wild type seedlings grew on 1/2 MS medium containing 20 or 1000  $\mu$ M Pi. Exogenous Pi affects early seedling growth. (c and d) Quantitative analysis of root length and hypocotyl length of the early growing seedlings treated with 20 or 1000  $\mu$ M Pi. Significance of difference was analyzed by Duncan's test (\* $p < 0.05$ , \*\* $p < 0.01$ , n = 9).

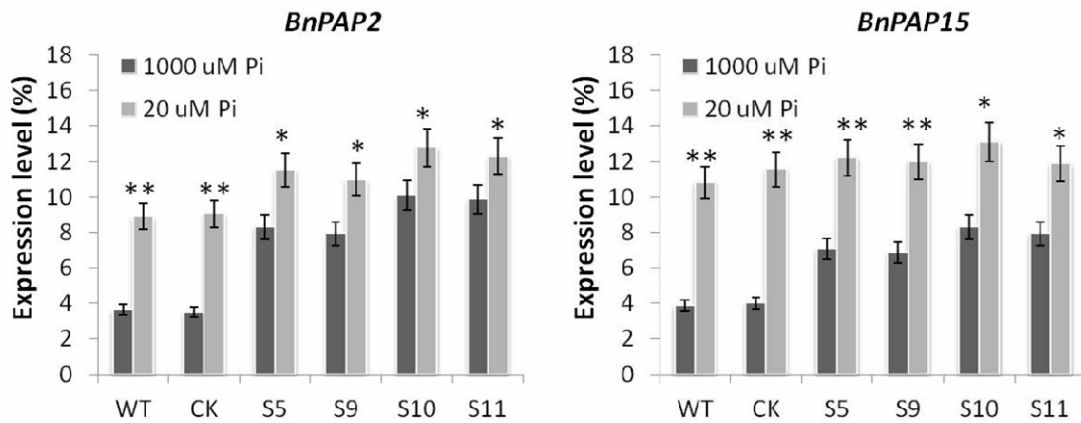

**Figure S6. Quantitative RT-PCR analysis of expression of *BnPAP2* and *BnPAP15* in *BnPHT1;4* overexpression transgenic *Brassica napus*.** Expression of *BnPAP2* and *BnPAP15* in 9-hours-imbibed seeds of the *BnPHT1;4* overexpression transgenic lines and controls (WT and CK) on 1/2 MS medium with 20 or 1000  $\mu$ M Pi. The error bars indicate the standard errors. Significance of difference was analyzed by Duncan's test (\* $p < 0.05$ , \*\* $p < 0.01$ ,  $n = 3$ ). WT, wild type; CK, transgenic null line; S5, S9, S10 and S11, independent *BnPHT1;4* overexpression transgenic lines.

**Table S1. Primers used in the real-time qRT-PCR analysis**

| primer names    | sequence (5'-3')                                |
|-----------------|-------------------------------------------------|
| <i>BnACT2</i>   | GACCGTATGAGCAAAGAGATCACA<br>TCTCGGGAGGTGCAACGA  |
| <i>BnPHT1;4</i> | GTACCGGCGGAGATCTTCCCAGC<br>CTACACAATGGGGACCGTTC |
| <i>BnPAP2</i>   | AGGATTAACAGTGGCCTCGT<br>CGCGTGTGTTGCTTCTAGAT    |
| <i>BnPAP15</i>  | AGGATTAACAGTGGCCTCGT<br>CGCGTGTGTTGCTTCTAGAT    |
| <i>BnGA1</i>    | TCCTCGCTTTGTTTCGTCTCT<br>GAGTGTGTCAACCTCCAACA   |
| <i>BnGA2</i>    | TTAAGAGAGAAAGCGCGCAA<br>TTCCTTGCACTCCCTTGGAA    |
| <i>BnGA3</i>    | TAAGAAGCGTTGGGAGAAGC<br>TCACCGTCTCTAAGCTTCCA    |
| <i>BnKAO</i>    | CTGAAGTCTTCCCGGATCCA<br>TCCGTGTTGCTCCTTTTCAC    |
| <i>BnNCED5</i>  | ATGGGGCCGTTTCTTTTGTC<br>TGCCAACAGAGCCTTTATTACA  |
| <i>BnNCED9</i>  | TTCGAGGGTTTTGGCTCAGT<br>CGAAATTGGTTTGCTTTTAC    |
| <i>BnABI4</i>   | CCAATAGCTCACAACCTCGGC<br>GCTCGTTTCCTAGCAGCTTC   |
| <i>BnIPS1</i>   | ATGAAGAGGCAGCTGATATTCA<br>ATCTGCTGATTCCGAGGGG   |
| <i>BnACP5</i>   | TGGAAGATCGTTCGTTGGTCA<br>GTCGGGTCAACATCTCCTCT   |
| <i>BnRNS1</i>   | GGAACACGAATGGGAGAAGC<br>TGGCTATTCCCAGACCCATC    |
| <i>BnPHO1</i>   | TTACCGTTCCGTGACATGGA<br>AAGCCAGTAGTCCCCTGTTC    |
| <i>BnPHT1;5</i> | ATCCGAAGAAGACTGACGCT<br>ATCTCTGTGCATCACCTCC     |
| <i>GUS</i>      | ACACCGATACCATCAGCGAT<br>TCTTCACTCCACATGTCGGT    |
